# Supplementary material for: PINK1-dependent phosphorylation of PINK1 and Parkin is essential for mitochondrial quality control
Source: PubMed Central journal article supplement (PMC5261015; doi:10.1038/cddis.2016.396), 2016-12-01

Figure S1

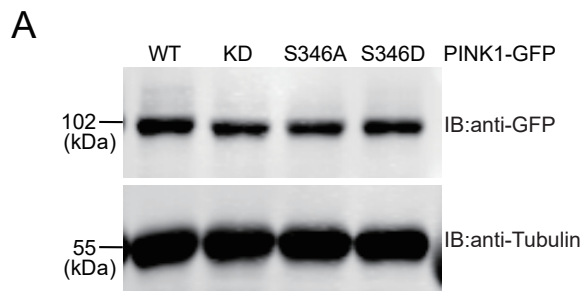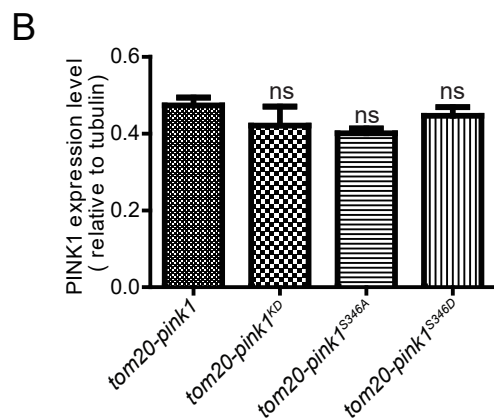

Supplement: cddis2016396x2.pdf [file cddis2016396x2.pdf]
